# Supplementary material for: Monolithic electrode for electric double-layer capacitors based on macro/meso/microporous S-Containing activated carbon with high surface area
Source: Royal Society of Chemistry journal article supplement (doi:10.1039/c0jm03793a), 2011-01-01
Supplement: c0jm03793a.pdf [file c0jm03793a.pdf]

## Electronic Supplementary Information for

# Monolithic Electrode for Electric Double-Layer Capacitors Based on Macro/meso/microporous S-Containing Activated Carbon with High Surface Area

By *George Hasegawa, Mami Aoki, Kazuyoshi Kanamori,\* Kazuki Nakanishi, Teiichi Hanada and Kiyoharu Tadanaga*

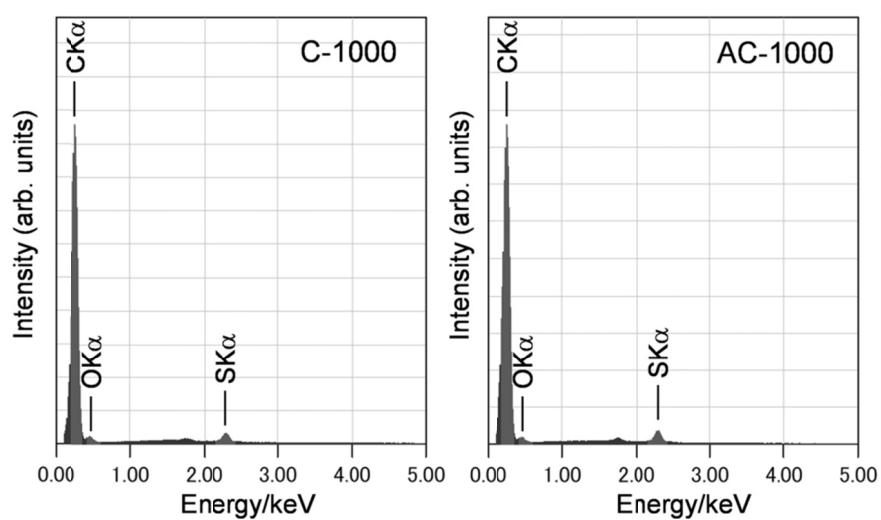

**Figure S1** Energy dispersive X-ray spectroscopy (EDS) analysis results of C-1000 and AC-1000.

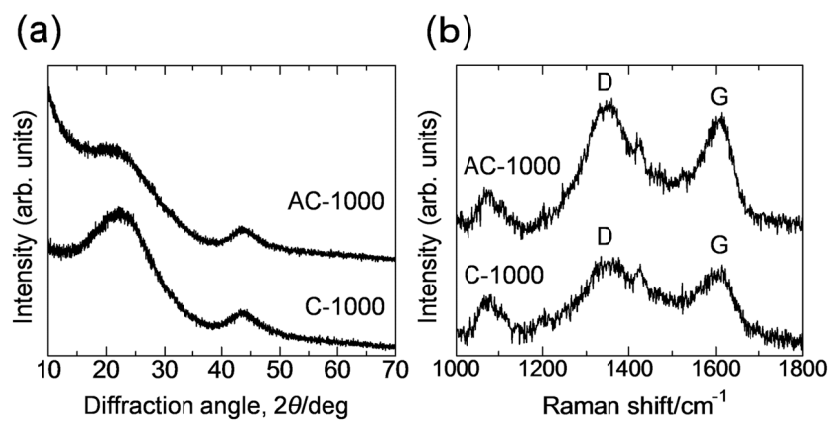

**Figure S2** XRD patterns (a) and Raman spectra (b) of C-1000 and AC-1000.
